# Supplementary material for: Minimal Residual Disease Detection using a Plasma-only Circulating Tumor DNA Assay in Patients with Colorectal Cancer
Source: Oxford University Press journal article supplement (doi:10.1158/1078-0432.ccr-21-0410), 2021-04-29
Supplement: 10780432ccr210410-sup-260003_2_supp_7041844_qr9kz4.docx [file 10780432ccr210410-sup-260003_2_supp_7041844_qr9kz4.docx]

**Supplementary Figures for**

**Minimal Residual Disease Detection using a Plasma-Only Circulating Tumor DNA Assay in Colorectal Cancer Patients**

Aparna R. Parikh1, Emily E. van Seventer1, Giulia Siravegna1, Anna V. Hartwig2, Ariel Jaimovich2, Yupeng He2, Katie Kanter1, Madeleine G. Fish1, Kathryn D. Fosbenner1, Benchun Miao3, Susannah Phillips3, John H. Carmichael3, Nihaarika Sharma3, Joy Jarnagin1, Islam Baiev1, Yojan S. Shah1, Isobel J. Fetter1, Heather A. Shahzade1, Jill N. Allen1, Lawrence S. Blaszkowsky1, Jeffrey W. Clark1, Jon S. Dubois1, Joseph W. Franses1, Bruce J. Giantonio1, Lipika Goyal1, Samuel J. Klempner1, Ryan D. Nipp1, Eric J. Roeland1, David P. Ryan1, Colin D. Weekes1, Jennifer Y. Wo4, Theodore S. Hong4, Liliana Bordeianou5, Cristina R. Ferrone5, Motaz Qadan3, Hiroko Kunitake5, David Berger5, Rocco Ricciardi5, James C. Cusack3, Victoria M. Raymond2, AmirAli Talasaz2, Genevieve M. Boland3, Ryan B. Corcoran1

1 Department of Medicine, Division of Hematology & Oncology, Massachusetts General Hospital Cancer Center & Harvard Medical School, Boston, Massachusetts, USA;

2 Guardant Health, Inc, Redwood City, CA, USA;

3 Department of Surgical Oncology, Massachusetts General Hospital, Boston, MA, USA;

4 Department of Radiation Oncology, Massachusetts General Hospital Cancer Center & Harvard Medical School, Boston, Massachusetts, USA;

5 Department of General and Gastrointestinal Surgery, Massachusetts General Hospital, Boston, Massachusetts, USA

**Running title:** Plasma-only MRD detection in CRC

**
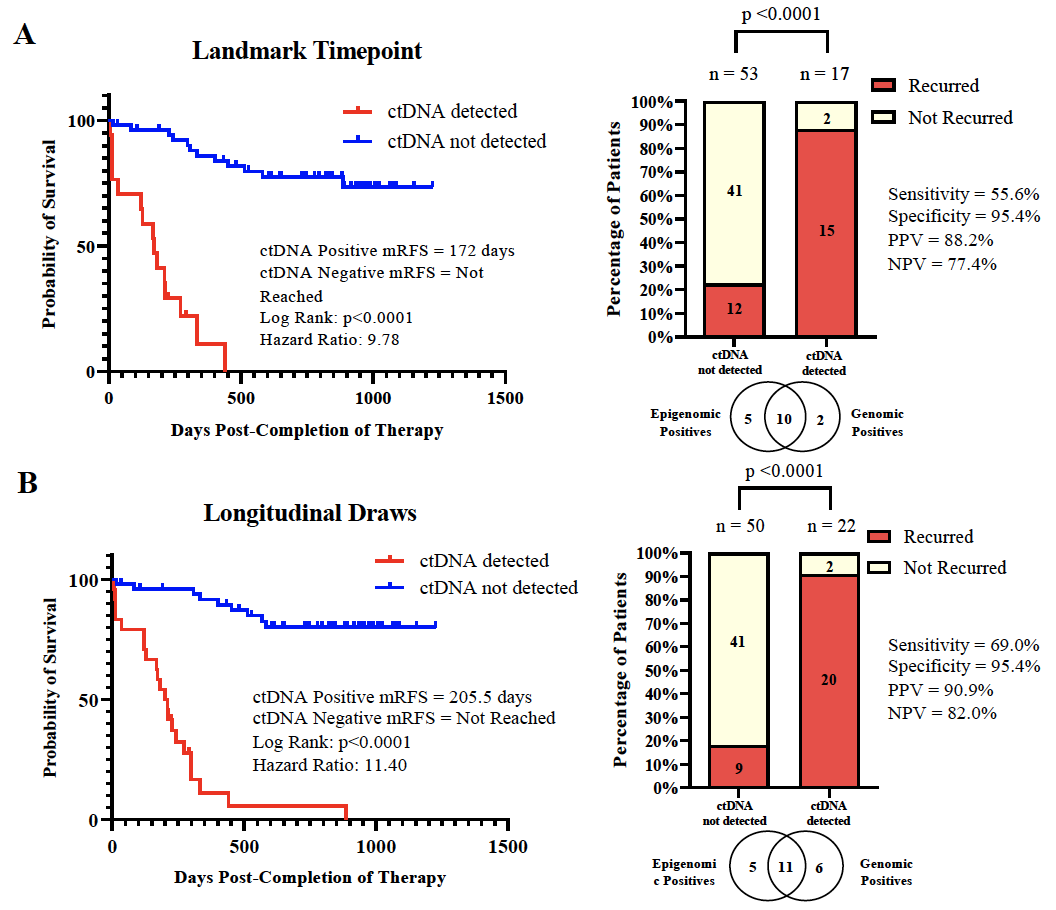
**

**Supplementary Figure S1.** (A) Recurrence-free survival by landmark one-month post-therapy ctDNA detection for all patients regardless of length of follow up. Bar graph displays recurrence rates by ctDNA detection status with Venn diagram of ctDNA detection by calling methods (epigenomic only, genomic only, or both). (B) Recurrence-free survival by longitudinal post-therapy ctDNA detection for all patients. Bar graph displays recurrence rates by ctDNA detection status with Venn diagram of ctDNA detection by calling methods (epigenomic only, genomic only, or both).

**
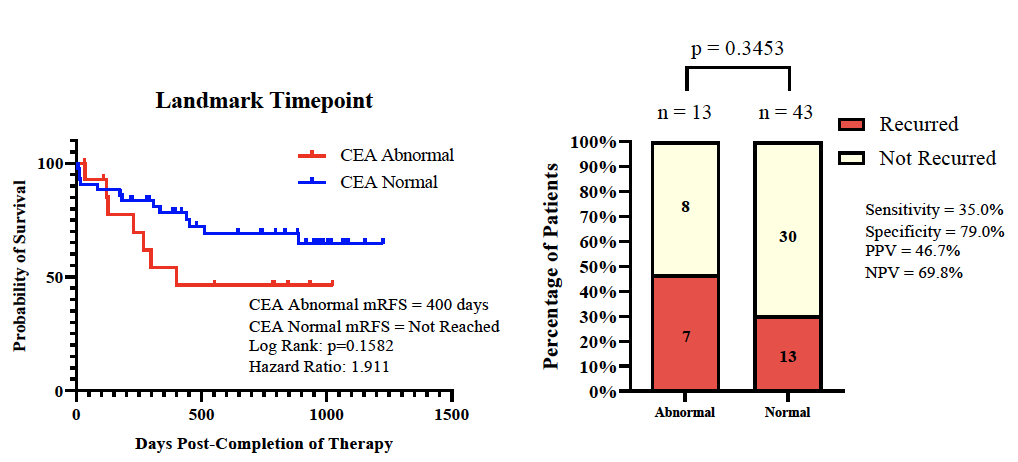
**

**Supplementary Figure S2.**

Recurrence-free survival by longitudinal post-therapy CEA levels for all patients. Bar graph displays recurrence displays recurrence abnormal and normal CEA detection status.
