# Supplementary material for: Minimal Residual Disease Detection using a Plasma-only Circulating Tumor DNA Assay in Patients with Colorectal Cancer
Source: Oxford University Press journal article supplement (doi:10.1158/1078-0432.ccr-21-0410), 2021-04-29
Supplement: 10780432ccr210410-sup-260003_2_supp_7041849_qr9kz4.xlsx [file 10780432ccr210410-sup-260003_2_supp_7041849_qr9kz4.xlsx]

## Sheet: Supplementary Table S1
Supplementary Table S1. Baseline patient and disease characteristics
Characteristic	Overall Cohort
	N = 84	%
Age (years)– median (range)	60 (35-84)
Sex
Female	33	39.3
Male	51	60.7
Stage at Surgery
I	8	9.5
II	20	23.8
III	40	47.6
IV	16	19
Sidedness
Right	18	21.4
Transverse	5	6
Left	31	36.9
Rectal	30	35.7
Neoadjuvant Treatment	38	45.2
Adjuvant Treatment	46	54.8
Type of Adjuvant Treatment
FOLFOX	31	67.4
CAPOX	7	15.2
FOLFOX + chemoxRT	3	6.5
5FU/LV	3	6.5
Other	2	4.3
Days on Adjuvant Treatment – median (range)	134.5 (28-463)
Experienced Disease Recurrence	30	35.7
Days from Surgery to Recurrence – median (range)	348.5 (35-887)
Days of Clinical Follow Up from Surgery – median (range)	632.5 (33-1246)

## Sheet: Supplementary Table S2
Supplementary Table S2. Baseline patient demographics and clinic characteristics
	Study ID	Gender	Age at Surgery	TNM Stage	Stage Group	Primary Tumor Site	Sidedness	Resection status	Received Neoadjuvant Treatment	Received Adjuvant Treatment	Recurred	Pre-Op Draw	Post-Op/Pre-Adjuvant Draw	Post-Adjuvant Draw	Landmark Draw	Longitudinal Draws
	TPS065	Male	70	ypT3N1a	III	Colon	Left	R1	1	0	1	Available	Available	Not Applicable	Available	Not Available
	TPS067	Male	48	ypT3N0	II	Rectal	Rectal	R0	1	0	1	Available	Available	Not Applicable	Available	Not Available
	TPS1019	Female	62	pT4bN1b	III	Colon	Left	R0	0	1	0	Not Available	Available	Not Available	Not Available	Not Available
	TPS1025	Male	60	pT3N2a	III	Colon	Right	R0	0	1	0	Not Available	Available	Available	Available	Not Available
	TPS1040	Female	51	pT3N1b	III	Colon	Right	R0	0	1	0	Not Available	Available	Available	Available	Not Available
	TPS1047	Female	78	ypT3N1b	III	Rectal	Rectal	R0	1	1	1	Available	Available	Available	Available	Not Available
	TPS113	Male	64	ypT3N0	II	Colon	Left	R0	1	0	1	Available	Available	Not Applicable	Available	Not Available
	TPS1170	Female	42	pT1N1a	III	Colon	Left	R0	0	1	0	Not Available	Available	Available	Available	Not Available
	TPS120	Male	70	ypT0N0	Stage III at Diagnosis	Rectal	Rectal	R0	1	0	0	Available	Available	Not Applicable	Available	Not Available
	TPS1279	Male	61	pT3N2b	III	Colon	Right	R0	0	1	0	Available	Not Available	Available	Available	Not Available
	TPS1355	Female	52	pT3N2a	III	Colon	Left	R0	0	1	0	Not Available	Available	Available	Available	Not Available
	TPS1363	Male	44	pT2N1b	III	Colon	Right	R0	0	1	0	Not Available	Available	Available	Available	Not Available
	TPS1425	Female	54	ypT0N1	III	Colon	Left	R0	0	1	0	Not Available	Available	Not Available	Not Available	Not Available
	TPS1473	Female	36	pT2N1b	III	Colon	Left	R0	0	1	0	Not Available	Available	Available	Available	Not Available
	TPS149	Male	45	IV	IV	Rectal	Rectal	R0	1	0	0	Available	Available	Not Applicable	Available	Not Available
	TPS1613	Female	76	pT3N2b	III	Colon	Right	R0	0	1	1	Available	Available	Available	Available	Not Available
	TPS165	Male	66	ypT3N0	II	Rectal	Rectal	R0	1	1	1	Available	Available	Available	Available	Available
	TPS1715	Male	57	pT3N2b	III	Colon	Right	R0	0	1	1	Not Available	Available	Available	Available	Not Available
	TPS172	Male	63	ypT2N0	I	Rectal	Rectal	R0	1	1	0	Available	Available	Available	Available	Not Available
	TPS182	Male	52	ypT2N0	I	Rectal	Rectal	R0	1	0	0	Available	Available	Not Applicable	Available	Not Available
	TPS186	Male	61	ypT4bN1aM1a	IV	Rectal	Rectal	R0	1	0	1	Available	Available	Not Applicable	Available	Not Available
	TPS216	Male	49	pT2N1a	III	Rectal	Rectal	R0	0	1	1	Available	Available	Available	Available	Not Available
	TPS218	Male	84	pT4aN0	II	Colon	Left	R0	0	0	1	Available	Available	Not Applicable	Available	Available
	TPS236	Female	44	ypT4N1cM1b	IVB	Colon	Left	R0	1	0	1	Available	Available	Not Applicable	Available	Not Available
	TPS246	Male	62	ypT1N1b	III	Rectal	Rectal	R0	1	1	0	Not Available	Available	Available	Available	Not Available
	TPS254	Female	61	pT2N1a	III	Colon	Left	R0	0	1	0	Available	Available	Available	Available	Not Available
	TPS259	Female	66	ypT2N0	I	Colon	Left	R0	1	0	0	Available	Available	Not Applicable	Available	Not Available
	TPS265	Male	50	ypT1N0	I	Rectal	Rectal	R0	1	1	0	Available	Available	Available	Available	Not Available
	TPS278	Male	57	ypT3N1b	III	Rectal	Rectal	R0	1	1	0	Available	Available	Available	Available	Not Available
	TPS285	Male	56	pT3N0	II	Rectal	Rectal	R0	1	0	0	Available	Available	Not Applicable	Available	Not Available
	TPS290	Female	56	ypT2N1	III	Colon	Left	R0	1	0	0	Available	Available	Not Applicable	Available	Not Available
	TPS296	Female	61	IV	IVB	Colon	Right	R0	1	1	1	Available	Not Available	Available	Available	Not Available
	TPS300	Female	56	ypT3N0	II	Rectal	Rectal	R0	1	1	0	Available	Available	Available	Available	Not Available
	TPS306	Female	81	unknown	II	Rectal	Rectal	R0	1	0	0	Available	Available	Not Applicable	Available	Not Available
	TPS330	Female	64	Metastatic	IV	Colon	Left	R0	0	0	0	Available	Available	Not Applicable	Available	Not Available
	TPS331	Female	50	pT3N1	III	Colon	Left	R0	0	1	0	Available	Available	Available	Available	Not Available
	TPS392	Male	52	ypT2N1b	III	Rectal	Rectal	R0	1	1	0	Available	Available	Available	Available	Not Available
	TPS406	Male	64	IV	IV	Colon	Right	R0	1	0	1	Available	Available	Not Applicable	Available	Available
	TPS411	Female	46	y pT3 N1b	III	Rectal	Rectal	R0	1	1	0	Available	Available	Not Available	Not Available	Not Available
	TPS416	Male	68	pT2N1b	III	Colon	Left	R0	0	1	0	Available	Available	Available	Available	Not Available
	TPS425	Female	68	pT3N0	II	Colon	Transverse	R0	0	0	0	Available	Available	Not Applicable	Available	Not Available
	TPS430	Male	60	IV	IV	Colon	Right	R0	1	0	0	Available	Available	Not Applicable	Available	Not Available
	TPS440	Male	81	pT3 N0	II	Colon	Transverse	R0	0	0	0	Available	Available	Not Applicable	Available	Not Available
	TPS443	Male	52	IV	IV	Colon	Left	R2	1	1	1	Available	Available	Available	Available	Available
	TPS444	Male	38	IV	IV	Colon	Left	R0	1	1	1	Available	Available	Available	Available	Available
	TPS446	Male	71	pT4aN1a	III	Colon	Right	R0	0	1	0	Available	Available	Available	Available	Not Available
	TPS460	Female	43	ypT3N2a	III	Rectal	Rectal	R1	1	0	1	Available	Available	Not Applicable	Available	Available
	TPS461	Male	67	pT4aN0	II	Colon	Right	R0	0	0	0	Available	Available	Not Applicable	Available	Not Available
	TPS480	Male	53	IV	IV	Rectal	Rectal	R0	0	1	1	Available	Available	Not Applicable	Available	Not Available
	TPS483	Male	51	pT3N1a	III	Colon	Left	R0	0	1	0	Available	Available	Available	Available	Not Available
	TPS485	Male	49	y pT2 N1b	III	Rectal	Rectal	R0	1	0	1	Available	Available	Not Applicable	Available	Not Available
	TPS486	Male	79	y pT3 N0	II	Rectal	Rectal	R0	1	0	0	Available	Available	Not Applicable	Available	Not Available
	TPS489	Male	61	Metastatic	IV	Rectal	Rectal	R0	0	0	0	Available	Available	Not Applicable	Available	Not Available
	TPS493	Male	71	pT3N0	II	Colon	Left	R0	0	0	0	Available	Available	Not Applicable	Available	Not Available
	TPS497	Male	64	pT4aN0	II	Colon	Left	R0	0	1	0	Available	Available	Available	Available	Not Available
	TPS521	Female	64	IVB	IVB	Colon	Right	R0	1	0	1	Available	Available	Not Applicable	Available	Not Available
	TPS527	Male	76	pT3N1	III	Colon	Transverse	R0	0	1	1	Available	Available	Available	Available	Not Available
	TPS529	Male	54	pT3N1a	III	Colon	Left	R0	0	1	0	Available	Available	Available	Available	Not Available
	TPS550	Male	72	pT3N0	II	Colon	Right	R0	0	0	0	Available	Available	Not Applicable	Available	Not Available
	TPS575	Female	75	pT2N0	I	Colon	Right	R0	0	0	0	Available	Available	Not Applicable	Available	Not Available
	TPS618	Female	53	pT4bN2b	III	Colon	Transverse	R0	0	1	1	Not Available	Available	Available	Available	Not Available
	TPS621	Male	41	ypT2N0	I	Rectal	Rectal	R0	1	1	0	Available	Available	Not Available	Not Available	Not Available
	TPS626	Male	45	pT1N1a	III	Colon	Left	R0	0	1	0	Available	Available	Available	Available	Not Available
	TPS641	Female	83	pT1N0	I	Colon	Transverse	R0	0	0	0	Available	Available	Not Applicable	Available	Not Available
	TPS644	Male	72	y pT3N1c	III	Rectal	Rectal	R0	1	0	1	Available	Available	Not Applicable	Available	Available
	TPS658	Male	62	pT4aN1a	III	Colon	Left	R0	0	1	1	Available	Available	Available	Available	Available
	TPS666	Female	56	pT3 N0	II	Colon	Left	R0	0	0	0	Available	Available	Not Applicable	Available	Not Available
	TPS718	Male	59	pT3N0	II	Colon	Right	R0	0	0	0	Available	Available	Not Applicable	Available	Not Available
	TPS725	Male	46	y pT3 N1b	III	Rectal	Rectal	R0	1	0	1	Available	Available	Not Applicable	Available	Available
	TPS733	Female	46	Metastatic	IV	Rectal	Rectal	R0	1	0	1	Available	Available	Not Applicable	Available	Available
	TPS742	Male	68	pT1Nx	I	Rectal	Rectal	R0	0	0	0	Available	Available	Not Applicable	Available	Not Available
	TPS751	Male	52	ypT3N1b	III	Rectal	Rectal	R0	1	0	1	Available	Available	Not Applicable	Available	Not Available
	TPS792	Female	81	pT4aN0	II	Colon	Right	R0	0	1	0	Available	Not Available	Available	Available	Not Available
	TPS796	Male	72	ypT2N1b	III	Rectal	Rectal	R0	1	1	1	Not Available	Available	Available	Available	Not Available
	TPS822	Female	35	pT3N0 (i+)	II	Colon	Left	R0	0	1	0	Available	Available	Available	Available	Not Available
	TPS848	Female	70	pT4aN2a	III	Colon	Right	R0	0	1	1	Available	Available	Available	Available	Not Available
	TPS849	Male	61	pT3N0	IV	Colon	Left	R0	1	0	0	Available	Available	Not Applicable	Available	Not Available
	TPS854	Male	42	IIB	II	Colon	Left	R0	0	0	0	Available	Available	Not Applicable	Available	Not Available
	TPS865	Female	51	pT3N0	II	Colon	Left	R0	0	0	0	Available	Available	Not Applicable	Available	Not Available
	TPS880	Female	39	IV	IV	Colon	Left	R0	1	1	1	Available	Available	Available	Available	Not Available
	TPS896	Female	54	IV	IV	Colon	Left	R0	0	1	1	Available	Available	Available	Available	Available
	TPS899	Female	62	pT1N1a	III	Rectal	Rectal	R0	0	1	0	Available	Available	Available	Available	Not Available
	TPS906	Male	75	pT4aN2b	III	Colon	Right	R0	0	1	0	Available	Available	Available	Available	Not Available
	TPS999	Male	35	pT1N1b	III	Colon	Left	R0	0	1	0	Available	Available	Available	Available	Not Available

## Sheet: Supplementary Table S3
Supplementary Table S3. ctDNA results by patient
	Study ID	Pre-Op Genomic Call	Pre-Op Epigenomic Call	Pre-Op Final Call	Post-Op/Pre-Adjuvant Genomic Call	Post-Op/Pre-Adjuvant Epigenomic Call	Post-Op/Pre-Adjuvant Final Call	Post-Adjuvant Genomic Call	Post-Adjuvant Epigenomic Call	Post-Adjuvant Final Call	Additional Draw 1 Genomic Call	Additional Draw 1 Epigenomic Call	Additional Draw 1 Final Call	Additional Draw 2 Genomic Call	Additional Draw 2 Epigenomic Call	Additional Draw 2 Final Call	Additional Draw 3 Genomic Call	Additional Draw 3 Epigenomic Call	Additional Draw 3 Final Call	Additional Draw 4 Genomic Call	Additional Draw 4 Epigenomic Call	Additional Draw 4 Final Call
	TPS065	Detected	Detected	Detected	Not Detected	Detected	Detected	Not Applicable	Not Applicable	Not Applicable
	TPS067	Not Detected	Detected	Detected	Not Detected	Detected	Detected	Not Applicable	Not Applicable	Not Applicable
	TPS1019	Not Available	Not Available	Not Available	Failed	Failed	Failed	Not Available	Not Available	Not Available
	TPS1025	Not Available	Not Available	Not Available	Failed	Failed	Failed	Not Detected	Not Detected	Not Detected
	TPS1040	Not Available	Not Available	Not Available	Failed	Failed	Failed	Failed	Failed	Failed
	TPS1047	Not Detected	Detected	Detected	Detected	Not Detected	Detected	Detected	Not Detected	Detected
	TPS113	Not Detected	Detected	Detected	Not Detected	Not Detected	Not Detected	Not Applicable	Not Applicable	Not Applicable
	TPS1170	Not Available	Not Available	Not Available	Failed	Failed	Failed	Failed	Failed	Failed
	TPS120	Not Detected	Not Detected	Not Detected	Not Detected	Not Detected	Not Detected	Not Applicable	Not Applicable	Not Applicable
	TPS1279	Detected	Not Detected	Detected	Not Available	Not Available	Not Available	Failed	Failed	Failed
	TPS1355	Not Available	Not Available	Not Available	Not Detected	Not Detected	Not Detected	Failed	Failed	Failed
	TPS1363	Not Available	Not Available	Not Available	Failed	Failed	Failed	Not Detected	Detected	Detected
	TPS1425	Not Available	Not Available	Not Available	Failed	Failed	Failed	Not Available	Not Available	Not Available
	TPS1473	Not Available	Not Available	Not Available	Failed	Failed	Failed	Detected	Detected	Detected
	TPS149	Detected	Not Detected	Detected	Not Detected	Not Detected	Not Detected	Not Applicable	Not Applicable	Not Applicable
	TPS1613	Not Detected	Detected	Detected	Not Detected	Detected	Detected	Not Detected	Detected	Detected
	TPS165	Not Detected	Not Detected	Not Detected	Not Detected	Not Detected	Not Detected	Not Detected	Not Detected	Not Detected	Failed	Failed	Failed	Failed	Failed	Failed
	TPS1715	Not Available	Not Available	Not Available	Failed	Failed	Failed	Not Detected	Not Detected	Not Detected
	TPS172	Not Detected	Not Detected	Not Detected	Not Detected	Not Detected	Not Detected	Not Detected	Not Detected	Not Detected
	TPS182	Not Detected	Not Detected	Not Detected	Not Detected	Not Detected	Not Detected	Not Applicable	Not Applicable	Not Applicable
	TPS186	Detected	Detected	Detected	Not Detected	Not Detected	Not Detected	Not Applicable	Not Applicable	Not Applicable
	TPS216	Not Detected	Not Detected	Not Detected	Not Detected	Not Detected	Not Detected	Detected	Detected	Detected
	TPS218	Detected	Detected	Detected	Not Detected	Not Detected	Not Detected	Not Applicable	Not Applicable	Not Applicable	Not Detected	Not Detected	Not Detected	Not Detected	Not Detected	Not Detected	Detected	Not Detected	Detected
	TPS236	Not Detected	Detected	Detected	Not Detected	Detected	Detected	Not Applicable	Not Applicable	Not Applicable
	TPS246	Not Available	Not Available	Not Available	Not Detected	Not Detected	Not Detected	Not Detected	Not Detected	Not Detected
	TPS254	Not Detected	Not Detected	Not Detected	Not Detected	Not Detected	Not Detected	Not Detected	Not Detected	Not Detected
	TPS259	Not Detected	Not Detected	Not Detected	Not Detected	Not Detected	Not Detected	Not Applicable	Not Applicable	Not Applicable
	TPS265	Not Detected	Not Detected	Not Detected	Not Detected	Not Detected	Not Detected	Not Detected	Not Detected	Not Detected
	TPS278	Not Detected	Not Detected	Not Detected	Not Detected	Not Detected	Not Detected	Not Detected	Not Detected	Not Detected
	TPS285	Detected	Not Detected	Detected	Not Detected	Not Detected	Not Detected	Not Applicable	Not Applicable	Not Applicable
	TPS290	Not Detected	Not Detected	Not Detected	Not Detected	Not Detected	Not Detected	Not Applicable	Not Applicable	Not Applicable
	TPS296	Detected	Detected	Detected	Not Available	Not Available	Not Available	Detected	Detected	Detected
	TPS300	Not Detected	Not Detected	Not Detected	Not Detected	Not Detected	Not Detected	Not Detected	Not Detected	Not Detected
	TPS306	Not Detected	Not Detected	Not Detected	Not Detected	Not Detected	Not Detected	Not Applicable	Not Applicable	Not Applicable
	TPS330	Not Detected	Not Detected	Not Detected	Not Detected	Not Detected	Not Detected	Not Applicable	Not Applicable	Not Applicable
	TPS331	Not Detected	Detected	Detected	Not Detected	Not Detected	Not Detected	Not Detected	Not Detected	Not Detected
	TPS392	Not Detected	Not Detected	Not Detected	Not Detected	Not Detected	Not Detected	Not Detected	Not Detected	Not Detected
	TPS406	Not Detected	Not Detected	Not Detected	Not Detected	Not Detected	Not Detected	Not Applicable	Not Applicable	Not Applicable	Not Detected	Not Detected	Not Detected
	TPS411	Failed	Failed	Failed	Not Detected	Not Detected	Not Detected	Not Available	Not Available	Not Available
	TPS416	Not Detected	Not Detected	Not Detected	Not Detected	Not Detected	Not Detected	Not Detected	Not Detected	Not Detected
	TPS425	Not Detected	Not Detected	Not Detected	Not Detected	Not Detected	Not Detected	Not Applicable	Not Applicable	Not Applicable
	TPS430	Not Detected	Not Detected	Not Detected	Not Detected	Not Detected	Not Detected	Not Applicable	Not Applicable	Not Applicable
	TPS440	Not Detected	Not Detected	Not Detected	Not Detected	Not Detected	Not Detected	Not Applicable	Not Applicable	Not Applicable
	TPS443	Failed	Failed	Failed	Not Detected	Not Detected	Not Detected	Not Detected	Not Detected	Not Detected	Not Detected	Not Detected	Not Detected	Not Detected	Not Detected	Not Detected	Detected	Not Detected	Detected	Failed	Failed	Failed
	TPS444	Not Detected	Not Detected	Not Detected	Not Detected	Not Detected	Not Detected	Not Detected	Not Detected	Not Detected	Not Detected	Not Detected	Not Detected	Detected	Not Detected	Detected	Detected	Not Detected	Detected
	TPS446	Not Detected	Not Detected	Not Detected	Not Detected	Not Detected	Not Detected	Failed	Failed	Failed
	TPS460	Failed	Failed	Failed	Not Detected	Not Detected	Not Detected	Not Applicable	Not Applicable	Not Applicable	Not Detected	Not Detected	Not Detected	Failed	Failed	Failed	Failed	Failed	Failed
	TPS461	Not Detected	Not Detected	Not Detected	Not Detected	Not Detected	Not Detected	Not Applicable	Not Applicable	Not Applicable
	TPS480	Detected	Detected	Detected	Detected	Detected	Detected	Not Applicable	Not Applicable	Not Applicable
	TPS483	Not Detected	Not Detected	Not Detected	Not Detected	Not Detected	Not Detected	Not Detected	Not Detected	Not Detected
	TPS485	Detected	Detected	Detected	Detected	Detected	Detected	Not Applicable	Not Applicable	Not Applicable
	TPS486	Detected	Not Detected	Detected	Not Detected	Not Detected	Not Detected	Not Applicable	Not Applicable	Not Applicable
	TPS489	Detected	Detected	Detected	Not Detected	Not Detected	Not Detected	Not Applicable	Not Applicable	Not Applicable
	TPS493	Not Detected	Not Detected	Not Detected	Not Detected	Not Detected	Not Detected	Not Applicable	Not Applicable	Not Applicable
	TPS497	Detected	Detected	Detected	Not Detected	Not Detected	Not Detected	Failed	Failed	Failed
	TPS521	Detected	Detected	Detected	Detected	Detected	Detected	Not Applicable	Not Applicable	Not Applicable
	TPS527	Detected	Detected	Detected	Detected	Detected	Detected	Detected	Detected	Detected
	TPS529	Not Detected	Not Detected	Not Detected	Not Detected	Not Detected	Not Detected	Not Detected	Not Detected	Not Detected
	TPS550	Detected	Detected	Detected	Not Detected	Not Detected	Not Detected	Not Applicable	Not Applicable	Not Applicable
	TPS575	Not Detected	Not Detected	Not Detected	Not Detected	Not Detected	Not Detected	Not Applicable	Not Applicable	Not Applicable
	TPS618	Not Available	Not Available	Not Available	Detected	Not Detected	Detected	Detected	Detected	Detected
	TPS621	Not Detected	Not Detected	Not Detected	Not Detected	Not Detected	Not Detected	Not Available	Not Available	Not Available
	TPS626	Detected	Detected	Detected	Not Detected	Not Detected	Not Detected	Not Detected	Not Detected	Not Detected
	TPS641	Not Detected	Not Detected	Not Detected	Not Detected	Not Detected	Not Detected	Not Applicable	Not Applicable	Not Applicable
	TPS644	Failed	Failed	Failed	Failed	Failed	Failed	Not Applicable	Not Applicable	Not Applicable	Detected	Not Detected	Detected
	TPS658	Not Detected	Not Detected	Not Detected	Not Detected	Not Detected	Not Detected	Not Detected	Not Detected	Not Detected	Not Detected	Not Detected	Not Detected	Not Detected	Not Detected	Not Detected	Not Detected	Not Detected	Not Detected
	TPS666	Detected	Detected	Detected	Not Detected	Not Detected	Not Detected	Not Applicable	Not Applicable	Not Applicable
	TPS718	Not Detected	Not Detected	Not Detected	Not Detected	Not Detected	Not Detected	Not Applicable	Not Applicable	Not Applicable
	TPS725	Failed	Failed	Failed	Failed	Failed	Failed	Not Applicable	Not Applicable	Not Applicable	Not Detected	Not Detected	Not Detected	Not Detected	Not Detected	Not Detected	Not Detected	Not Detected	Not Detected
	TPS733	Not Detected	Detected	Detected	Not Detected	Not Detected	Not Detected	Not Applicable	Not Applicable	Not Applicable	Not Detected	Not Detected	Not Detected
	TPS742	Detected	Not Detected	Detected	Not Detected	Not Detected	Not Detected	Not Applicable	Not Applicable	Not Applicable
	TPS751	Failed	Failed	Failed	Detected	Not Detected	Detected	Not Applicable	Not Applicable	Not Applicable
	TPS792	Detected	Detected	Detected	Not Available	Not Available	Not Available	Failed	Failed	Failed
	TPS796	Not Available	Not Available	Not Available	Not Detected	Not Detected	Not Detected	Detected	Detected	Detected
	TPS822	Not Detected	Not Detected	Not Detected	Not Detected	Not Detected	Not Detected	Not Detected	Not Detected	Not Detected
	TPS848	Detected	Not Detected	Detected	Detected	Not Detected	Detected	Failed	Failed	Failed
	TPS849	Not Detected	Not Detected	Not Detected	Not Detected	Not Detected	Not Detected	Not Applicable	Not Applicable	Not Applicable
	TPS854	Detected	Detected	Detected	Not Detected	Not Detected	Not Detected	Not Applicable	Not Applicable	Not Applicable
	TPS865	Not Detected	Not Detected	Not Detected	Not Detected	Not Detected	Not Detected	Not Applicable	Not Applicable	Not Applicable
	TPS880	Detected	Not Detected	Detected	Detected	Detected	Detected	Detected	Detected	Detected
	TPS896	Not Detected	Detected	Detected	Not Detected	Detected	Detected	Not Detected	Not Detected	Not Detected	Detected	Detected	Detected
	TPS899	Not Detected	Not Detected	Not Detected	Not Detected	Not Detected	Not Detected	Not Detected	Not Detected	Not Detected
	TPS906	Failed	Failed	Failed	Not Detected	Not Detected	Not Detected	Not Detected	Not Detected	Not Detected
	TPS999	Not Detected	Not Detected	Not Detected	Not Detected	Not Detected	Not Detected	Not Detected	Not Detected	Not Detected

## Sheet: Supplementary Table S4
Supplementary Table S4. Recurrence-free survival by ctDNA detection grouped by stage and treatment
		N	Hazard Ratio (95% CI)	p-value
	Adjuvant Therapy	33	7.35 (1.72-31.42)	<0.0001
	No Adjuvant Therapy	37	12.03 (1.77-81.70)	<0.0001
	Neoadjuvant Therapy	34	8.01 (2.07-30.94)	<0.0001
	No Neoadjuvant Therapy	36	9.72 (1.24-75.92)	<0.0001
	Stage I-III	54	13.85 (2.85-67.42)	<0.0001
	Stage IV	16	6.00 (0.99-36.50)	0.0003
